# Supplementary material for: Combining behavioural activation with physical activity promotion for adults with depression: findings of a parallel-group pilot randomised controlled trial (BAcPAc)
Source: PubMed Central journal article supplement (PMC4545876; doi:10.1186/s13063-015-0881-0), 2015-08-20

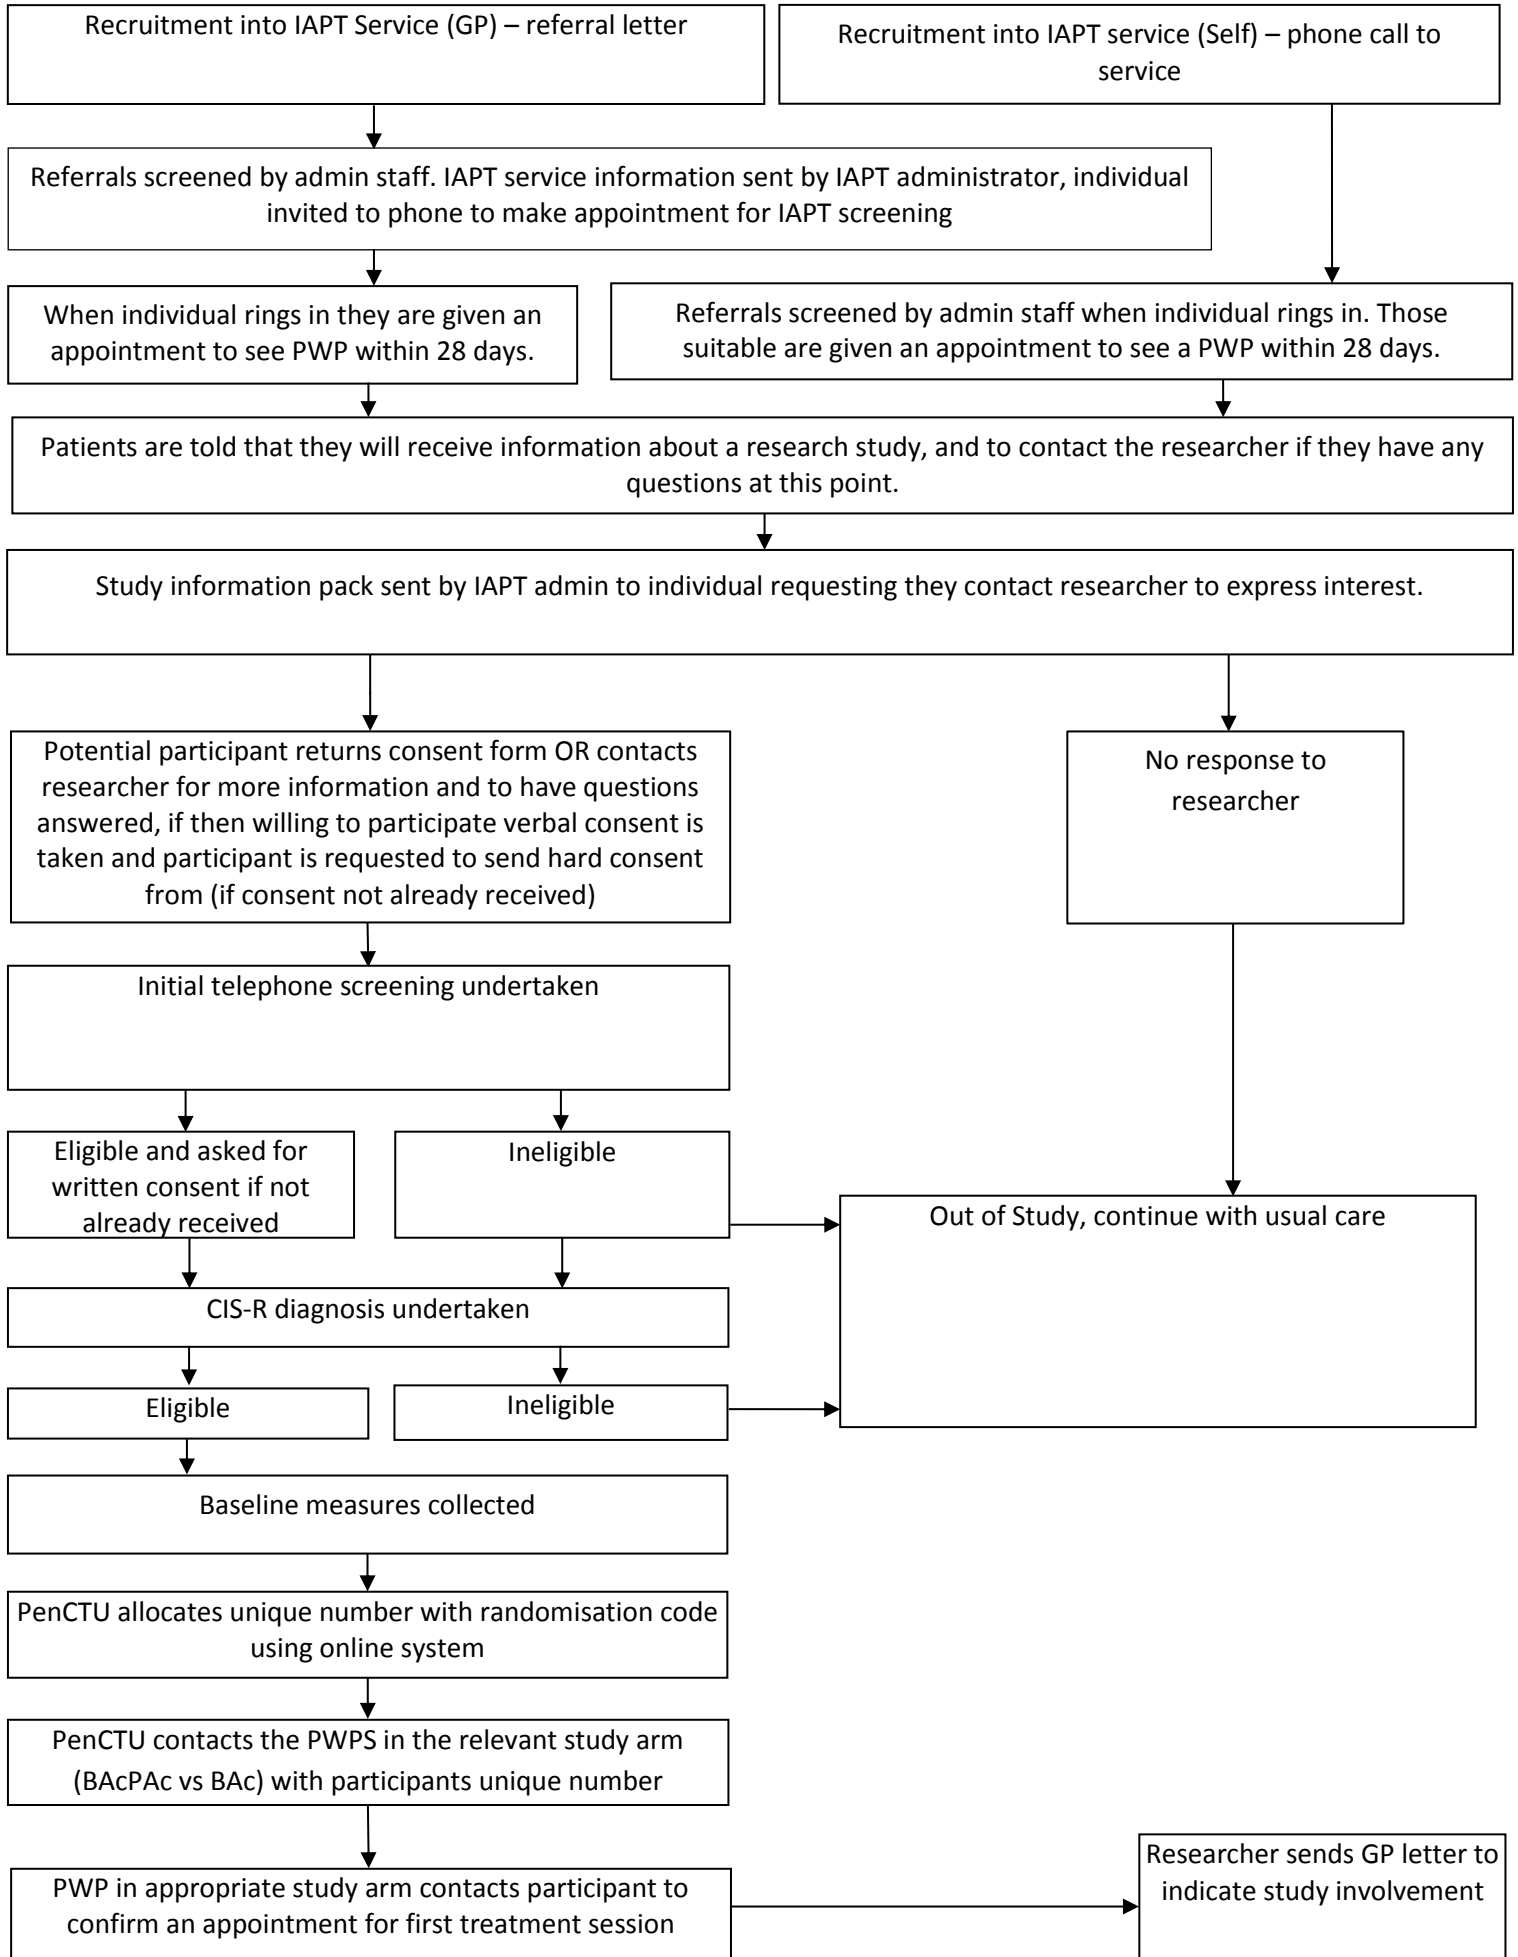

Supplement: 13063_2015_881_MOESM2_ESM.pdf [file 13063_2015_881_MOESM2_ESM.pdf]
